# Supplementary material for: Rational design of a carbon/potassium poly(heptazine imide) heterojunction for enhanced photocatalytic H2 and H2O2 evolution
Source: Royal Society of Chemistry journal article supplement (doi:10.1039/d3ta05701a), 2023-11-27
Supplement: d3ta05701a1.pdf [file d3ta05701a1.pdf]

## Supporting Information

### Rational Design of Carbon/Potassium Poly(heptazine imide) Heterojunction for Enhanced Photocatalytic H<sub>2</sub> and H<sub>2</sub>O<sub>2</sub> Evolution

*Christian Mark Pelicano, \*<sup>a</sup> Jiaxin Li,<sup>a</sup> María Cabrero-Antonino,<sup>b</sup> Ingrid F. Silva,<sup>a</sup> Lu Peng,<sup>a</sup> Nadezda V. Tarakina,<sup>a</sup> Sergio Navalón,<sup>b</sup> Hermenegildo García,<sup>b</sup> and Markus Antonietti\*<sup>a</sup>*

\*Corresponding authors

<sup>a</sup>Department of Colloid Chemistry, Max Planck Institute of Colloids and Interfaces, Potsdam 14476, Germany

E-mail: christianmark.pelicano@mpikg.mpg.de, markus.antonietti@mpikg.mpg.de

<sup>b</sup>Departamento de Química and Instituto de Tecnología Química (CSIC-UPV), Universitat Politècnica de València, València 46022, Spain

## Experimental Section

### 1. Chemicals

All chemicals and solvents used were purchased from different chemical suppliers (Merck, Sigma-Aldrich, ) in high purity grade and were used as received. 5-aminotetrazole monohydrate was dried in a vacuum oven before using.

### 2. Catalyst Preparation

#### *Synthesis of Ad-carbon:*

Typically, 1 g of adenine and 10 g of CsAc were placed in a nickel crucible with a lid and heated at 800 °C for 2 h (heating ramp: 1 °C min<sup>-1</sup>) under N<sub>2</sub> in a muffle furnace.<sup>1</sup> After cooling down, the carbonized products were ground and transferred to 1 M HCl aqueous solution, stirred overnight, and filtered by a Büchner funnel. The above procedures were repeated two times. The collected powders were then rinsed with deionised H<sub>2</sub>O and dried at 60 °C for 4 h to get the final carbon.

#### *Synthesis of carbon dots (CD):*

3 g of citric acid and 1 g of urea were mixed in a 8 mL of deionised H<sub>2</sub>O in a beaker and vigorously stirred until a transparent solution was obtained. Then the solution was placed inside a microwave oven and irradiated at 600 W for 10 min. The resulting solid product was then dried in an oven at 80 °C for 10 h to remove residual small molecules. The crude CD suspension was purified in a centrifuge at 8000 rpm for 1 h to remove large particles or agglomerates. The final brown aqueous solution was washed with a mixture of methanol and dichloromethane in ratios of 1:2 and 2:1. As a last step, the solution was dried to obtain the CD as a solid.<sup>2</sup>

#### *Synthesis of 4-hydroxy-1H-pyrrolo[3,4-c]pyridine-1,3,6(2H,5H)-trione (HPPT):*

2 g of citric acid and 3 g of urea were added to a large beaker and stirred at 120°C in an oil bath until everything is molten. The reaction mixture was reacted further at 120°C. It turned brown and increasingly solid. When it became completely solid, the product was ground and stirred for 24 h at 120°C in an oil bath.

#### *Synthesis of KPHI and carbon material/KPHI (CM/KPHI) hybrids:*

Potassium poly(heptazine imide) (KPHI) was synthesized according to a previously reported study.<sup>3</sup> 2.5 g of 5-aminotetrazole and 12.5 g of KCl/LiCl eutectic (0.55/0.45 ratio) were placed in a steel ball mill vessel. The mixture was then ground at operational frequency of 25 Hz for 5 min. The resulting white powder was transferred into a porcelain crucible covered with a lid, and placed in a furnace. The temperature inside the furnace was increased to 600 °C within 4 h under a flow of N<sub>2</sub> gas (4 L min<sup>-1</sup>) and maintained this temperature for another 4 h. Subsequently, the furnace was allowed to naturally cool down to room temperature. The melt from the crucible was then transferred into a beaker with 300 mL deionized H<sub>2</sub>O and was stirred at room temperature overnight. Then the product was vacuum-filtered and washed extensively with H<sub>2</sub>O by centrifugation (5 x 2mL, 13 500 min<sup>-1</sup>, 3 min), and dried in a vacuum oven at 60 °C for 3 h. The preparation for CM/KPHI hybrids follows the same protocol except that the carbon materials were added along with 5-aminotetrazole and the eutectic salt template.

### 3. Materials Characterizations

X-ray diffraction was conducted with a Rigaku SmartLab (Japan, Cu K, 0.154 nm). UV–vis absorption spectra were acquired using Shimadzu UV 2600 in diffuse reflectance mode. FTIR spectroscopy was performed using a Thermo Scientific Nicolet iD5 spectrometer with the attenuated total reflection sampling technique. Steady-state photoluminescence (PL) spectra were measured using a Jasco FP-8300 fluorescence spectrometer at an excitation wavelength of 365 nm. Time-resolved PL (TRPL) spectra were recorded on fluorescence lifetime spectrometer (FluoTime 250, PicoQuant) equipped with PDL 800-D picosecond pulsed diode laser drive. Elemental combustion analysis was performed with a vario MICRO cube CHNOS elemental analyzer (Elementar Analysensysteme GmbH). Inductively coupled plasma mass spectrometry (ICP-MS) was performed with a PerkinElmer ICP-OES Optima 8000. Transmission electron microscopy (TEM) images were taken using JEOL JEM F200 and a double Cs corrected JEOL JEM-ARM200F operated at 80kV and equipped with a cold-field emission gun and high-angle silicon drift Energy Dispersive X-ray (EDX) detector (Jeol JED-2300 100 mm<sup>2</sup>, Japan) (solid angle up to 0.98 steradians with a detection area of 100 mm<sup>2</sup>). Annular Dark Field Scanning Transmission Electron Microscopy (ADF – STEM) images were collected at a probe convergence semi-angle of 25 mrad. The morphologies of the samples were observed using a scanning electron microscope (SEM) (Zeiss LEO 1550-Gemini) equipped with an EDX (Oxford Instruments X-MAX). Nitrogen adsorption and desorption isotherms were measured at 77 K using a Quantachrome Quadrasorb SI apparatus. The samples were degassed at 150 °C under vacuum (0.5 Torr) for 20 h prior to each measurement. The specific surface area of each material was calculated from the adsorption branch data ( $P/P_0 < 0.3$ ) using the Brunauer–Emmett–Teller (BET) method.

### 4. Photocatalytic Experiments

#### *Photocatalytic H<sub>2</sub> Evolution*

Sacrificial photocatalytic H<sub>2</sub> evolution experiments were performed in a closed system equipped with a pressure detector to monitor the pressure build-up of the gases evolving during photocatalytic reactions. White LED (50 W,  $\lambda > 420$  nm), purple LED (50 W,  $\lambda = 410$  nm) and a green LED (50 W,  $\lambda = 535$  nm) were used as light source for the photocatalytic evaluation. A total volume of 38 mL was used and the temperature during the reaction was maintained at

295 K by a water circulator unit. Typically, 50 mg of photocatalyst powder was dispersed in a 38 mL mixture of DI H<sub>2</sub>O and TEOA with a volume ratio of 9:1, which was degassed beforehand to remove the dissolved O<sub>2</sub> in the solution. The reactor was then illuminated from the side for 6 h. 3 wt% of Pt cocatalyst was nominally photodeposited onto the photocatalysts using a K<sub>2</sub>PtCl<sub>4</sub> precursor. Finally, the amount of the evolved gas was calculated after 5 h (1st h was excluded) of irradiation according to the Clausius–Clapeyron relation ( $PV = nRT$ ).

#### *Photocatalytic H<sub>2</sub>O<sub>2</sub> Production*

Sacrificial photocatalytic H<sub>2</sub>O<sub>2</sub> production experiments were performed in a 4 mL vial reactor. First, 5 mg of catalyst was dispersed in 2 mL of a 3.5% w/w glycerin aqueous solution then O<sub>2</sub> gas was bubbled for 1 min. The reactor was then irradiated under stirring using two purple LED lamps (50 W each,  $\lambda = 410$  nm) for 1 h. The suspension was then centrifuged at 10 000 rpm for 10 min to separate the catalysts from the solution. The generated H<sub>2</sub>O<sub>2</sub> was quantified spectrophotometrically following the titanium oxalate method previously reported in the literature.<sup>4</sup> Basically, a 10 g L<sup>-1</sup> solution of K<sub>2</sub>[TiO(C<sub>2</sub>O<sub>4</sub>)<sub>2</sub>] $\cdot$ 2H<sub>2</sub>O was prepared using 450 mL of water and 50 mL of sulfuric acid to avoid the complex precipitation. Subsequently, 3 mL of this reagent was mixed with 1 mL of the supernatant from the photocatalytic experiment. The resulting solutions, properly diluted when needed, were analyzed using the UV–vis spectrometer, collecting absorbance values at 400 nm. A calibration curve was made with external samples of known H<sub>2</sub>O<sub>2</sub> concentrations between 0–10 mmol L<sup>-1</sup> with a linear analytical response ( $R^2 = 0.99996$ ).

#### *Apparent Quantum Yield (AQY) Estimation*

The AQY was measured using a monochromatic visible light ( $410 \pm 1.0$  nm). The AQY was obtained by the following equation:

$$AQY (\%) = \frac{2 \times r_{product} \times N_A \times hc}{I \times A \times \lambda} \times 100$$

where  $r_{product}$  is the production rate of H<sub>2</sub> or H<sub>2</sub>O<sub>2</sub> molecules (mol s<sup>-1</sup>) after the 1<sup>st</sup> hour of photocatalytic reaction,  $N_A$  is Avogadro constant ( $6.022 \times 10^{23}$  mol<sup>-1</sup>),  $h$  is the Planck constant ( $6.626 \times 10^{-34}$  J s<sup>-1</sup>) multiplied by  $c$  the speed of light ( $3 \times 10^8$  m s<sup>-1</sup>) giving ( $1.98644586 \times 10^{-25}$  J m),  $A$  is the irradiation area (cm<sup>2</sup>),  $I$  is the intensity of irradiation light (W cm<sup>-2</sup>), and  $\lambda$  is the wavelength of the monochromatic light (m).

## 5. (Photo)electrochemical Tests

All (photo)electrochemical measurements were carried out in a three-electrode configuration, with a Pt coil and Ag/AgCl as counter and reference electrodes, respectively.

### *Electrocatalytic Hydrogen Evolution Reaction (HER) and Oxygen Reduction Reaction (ORR) Measurements*

The electrocatalysis experiments were conducted with a Gamry Interface 1010E potentiostat. To prepare the working electrode, F-doped tin oxide (FTO) glass (3 x 1 cm) substrates were cleaned sequentially with detergent, distilled H<sub>2</sub>O and ethanol for 10 min each to remove organic impurities. Half of the FTO area was protected with a Scotch tape. A catalyst ink was obtained by mixing 5 mg of photocatalyst powder, 0.5 mL of H<sub>2</sub>O and 20  $\mu$ L of 5 wt.% Nafion by sonication. Then, 50  $\mu$ L of catalyst slurry was pipetted onto the FTO electrode and dried at 65 °C and further heated at 120 °C for 1 h to improve adhesion. HER and ORR activities were measured in N<sub>2</sub>- and O<sub>2</sub>-saturated 0.2 M aqueous Na<sub>2</sub>SO<sub>4</sub> solution, respectively. All potentials described were given in reference to the reversible hydrogen electrode (RHE).

### *Transient Photocurrent Response, Electrochemical Impedance Spectroscopy (EIS), and Mott-Schottky Analysis*

The photocurrent response was measured (0.3 V vs. ref) under 100 mW cm<sup>-2</sup> white LED illumination in 0.2 M aqueous Na<sub>2</sub>SO<sub>4</sub> solution using a Gamry Interface 1010E potentiostat. For EIS, the same electrodes were used as described above and the measurements were done in a frequency range of 10 kHz to 1 Hz. The data were fitted to a full semicircle using ZView software. Mott–Schottky measurements were performed in a Biologic MPG-2 system at 10 kHz.

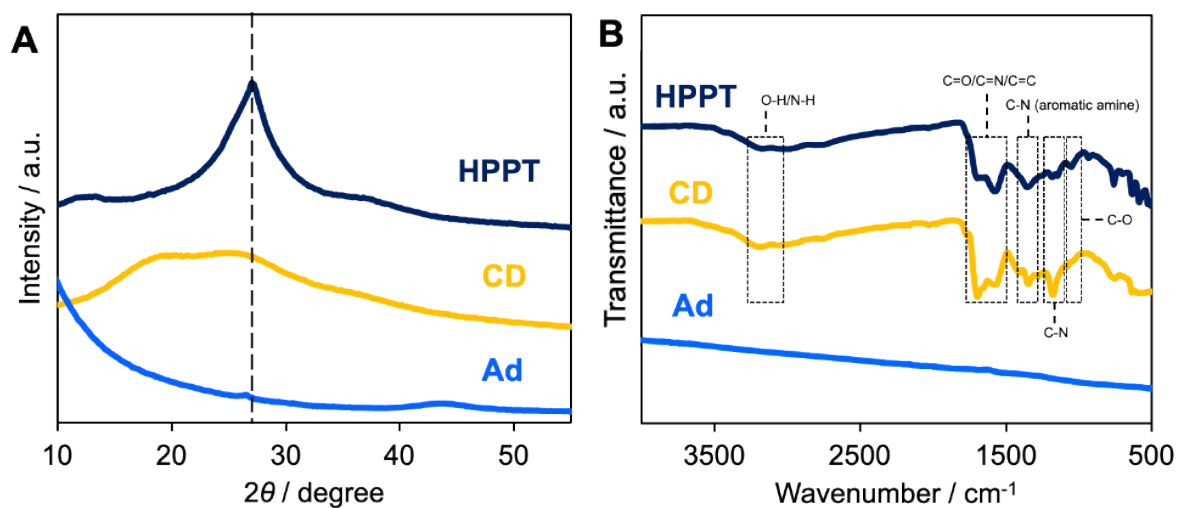

Figure S1. (A) XRD patterns and (B) FTIR spectra of Ad-carbon, CD and HPPT.

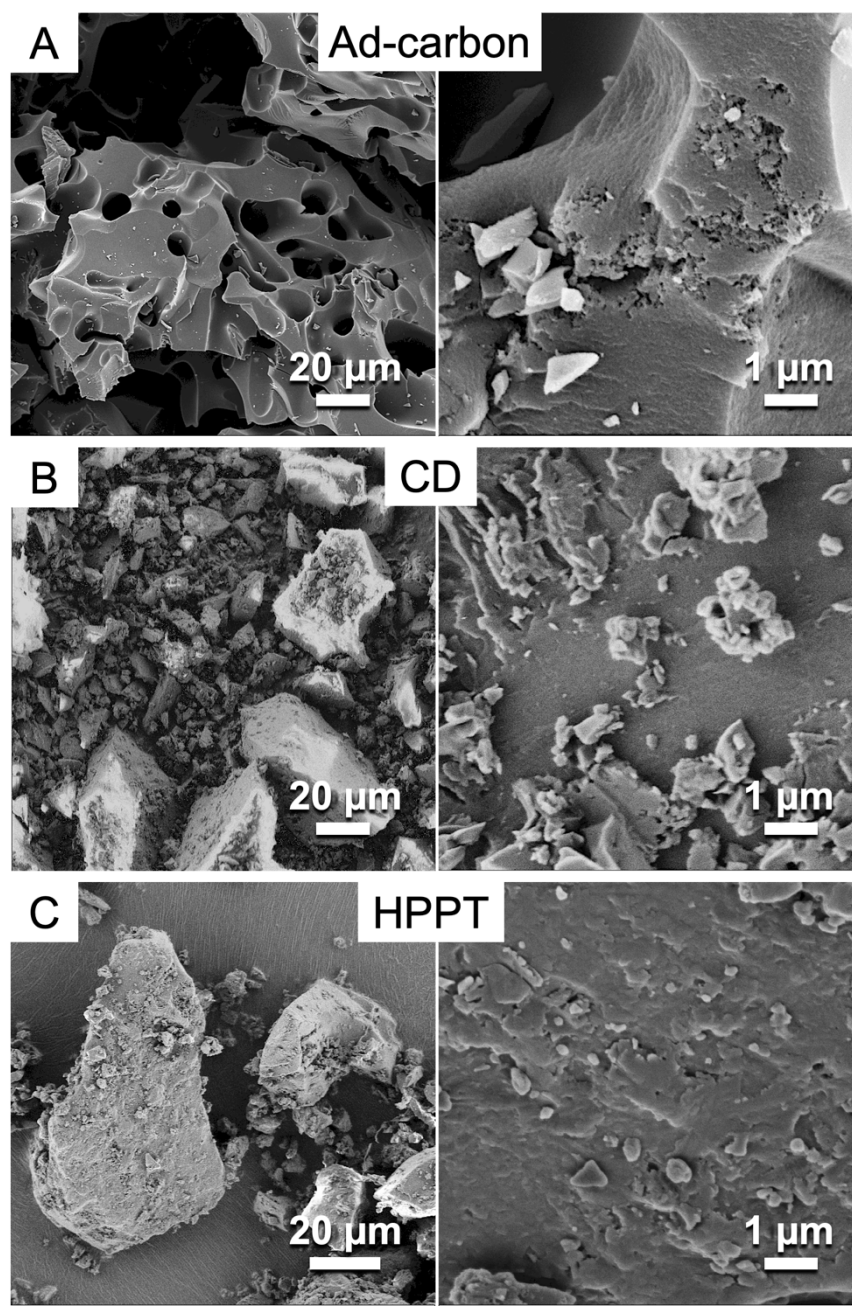

Figure S2. SEM images of various carbonaceous materials: (A) Ad-carbon, (B) CD, and (C) HPPT.

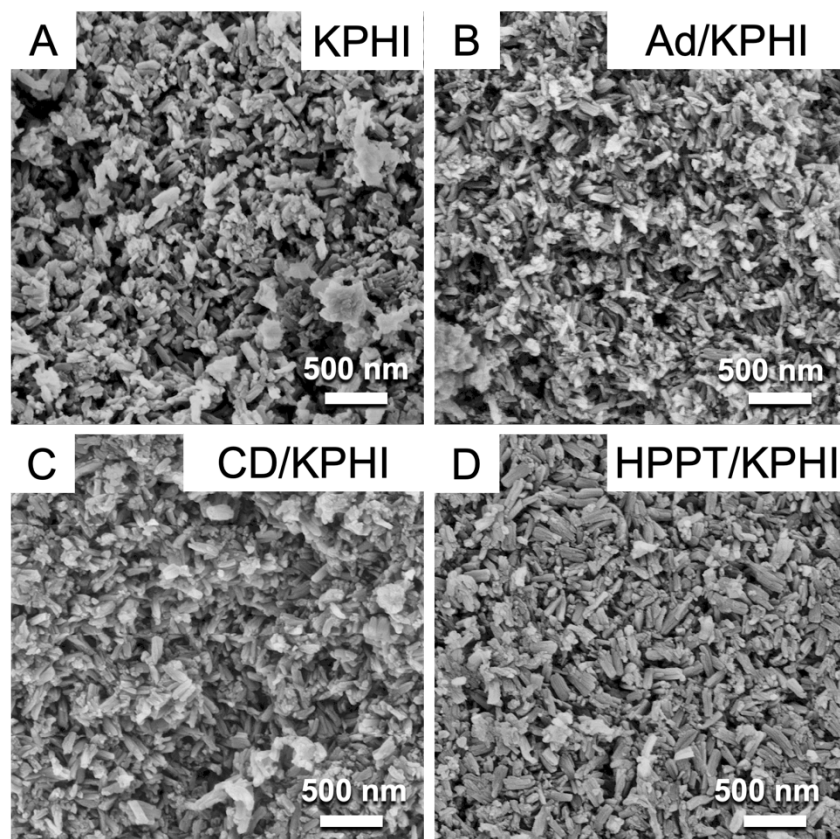

Figure S3. SEM images of (A) KPHI, (B) 0.3Ad/KPHI, (C) 0.3CD/KPHI and (D) 0.3HPPT/KPHI.

Table S1. BET specific surface area and pore diameter size of CM, KPHI and CM/KPHI hybrids

| Sample                   | $S_{\text{BET}}$<br>( $\text{m}^2 \text{g}^{-1}$ ) | Pore Radius<br>(nm) |
|--------------------------|----------------------------------------------------|---------------------|
| Ad-carbon                | 3306                                               | 1.9                 |
| CD                       | 1.5                                                | 1.7                 |
| HPPT                     | 1.2                                                | 1.7                 |
| KPHI                     | 86.4                                               | 1.9                 |
| 0.3Ad/KPHI               | 79.7                                               | 1.9                 |
| 0.3CD <sub>m</sub> /KPHI | 73.1                                               | 1.9                 |
| 0.3HPPT/KPHI             | 52.9                                               | 1.9                 |

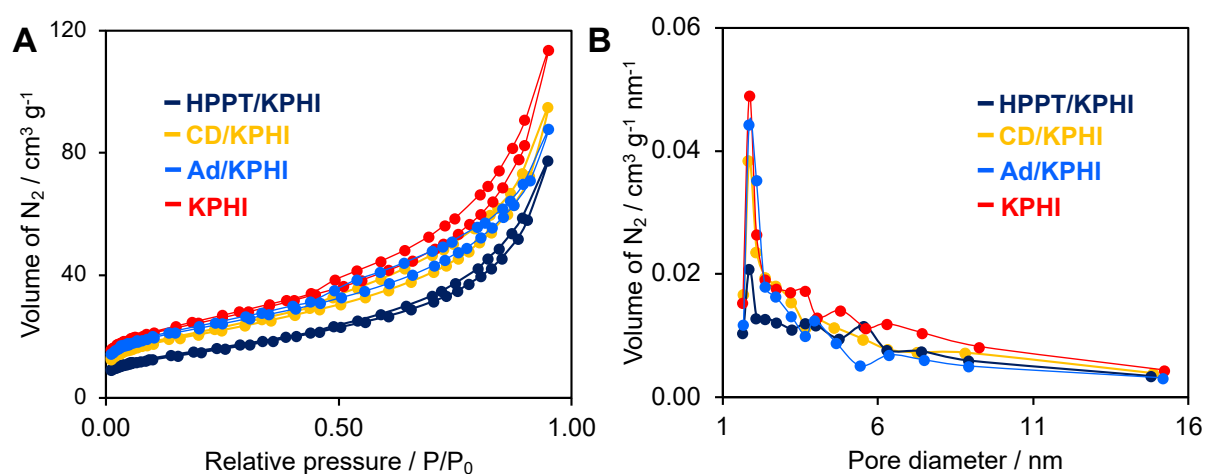

Figure S4. (A) N<sub>2</sub> adsorption/desorption isotherm at 77 K and (B) BJH pore size distribution from the N<sub>2</sub> adsorption branch at 77 K of the KPHI and CM/KPHI hybrids.

Table S2. Chemical composition of KPHI and CM/KPHI hybrids\*



| Sample | N % | C % | H % | C/N<br>mass | C/H<br>mass | K % | Li % |
|--------|-----|-----|-----|-------------|-------------|-----|------|
|--------|-----|-----|-----|-------------|-------------|-----|------|

| Samples                  | Light source                       | Amount of catalyst<br>/Cocatalyst | HER rate<br>$\mu\text{mol h}^{-1}$<br>$\text{g}_{\text{cat}}^{-1}$ | Reference        |      |      |     |
|--------------------------|------------------------------------|-----------------------------------|--------------------------------------------------------------------|------------------|------|------|-----|
| <b>0.3Ad/KPHI</b>        | <b>50 W LED lamp (&gt; 420 nm)</b> | <b>50 mg/3 wt% Pt</b>             | <b>738</b>                                                         | <b>This work</b> |      |      |     |
| KPHI                     | 300 W Xe lamp (> 420 nm)           | 14-20 mg/ 8 wt% Pt                | 600                                                                | 5                |      |      |     |
| CNB <sub>0.2</sub>       | 500 W HBO lamp (> 420 nm)          | 100 mg/ 3 wt% Pt                  | 300                                                                | 6                |      |      |     |
| OCNA-6                   | 300 W Xe lamp (> 420 nm)           | 25 mg/3 wt% Pt                    | 663                                                                | 7                |      |      |     |
| ONLH-600                 | 300 W Xe lamp (> 420 nm)           | 30 mg/5 wt% Pt                    | 340                                                                | 8                |      |      |     |
| P-TCN                    | 300 W Xe lamp (> 420 nm)           | 100 mg/1 wt% Pt                   | 670                                                                | 9                |      |      |     |
| KPHI                     | 44.8                               | 27.7                              | 2.1                                                                | 0.62             | 13.4 | 9.6  | 0.2 |
| 0.3Ad/KPHI               | 45                                 | 27.7                              | 2.2                                                                | 0.62             | 12.8 | 9.6  | 0.2 |
| 0.3CD <sub>m</sub> /KPHI | 44.8                               | 28                                | 2.2                                                                | 0.62             | 12.6 | 11.1 | 0.2 |
| 0.3HPPT/KPHI             | 45                                 | 27.5                              | 2.1                                                                | 0.61             | 12.9 | 9.9  | 0.2 |

\*Mass percentages of N, C and H elements were measured using combustion analysis while inductively coupled plasma optical emission spectrometry (ICP-OES) was used for determining the mass percentages of K and Li.

Table S3. Comparison of H<sub>2</sub> evolution rates of different carbon nitride-based photocatalysts reported in the literature

|           |                          |                |      |    |
|-----------|--------------------------|----------------|------|----|
| HTCN-500  | 350 W Xe lamp            | 20 mg/3 wt% Pt | 890  | 10 |
| PTYs CN-2 | 300 W Xe lamp (> 420 nm) | 50 mg/1 wt% Pt | 740  | 11 |
| PCNT-3    | 300 W Xe lamp (> 420 nm) | 50 mg/3 wt% Pt | 2020 | 12 |
| CN-NaK    | 50 W LED lamp (> 420 nm) | 50 mg/3 wt% Pt | 5560 | 13 |

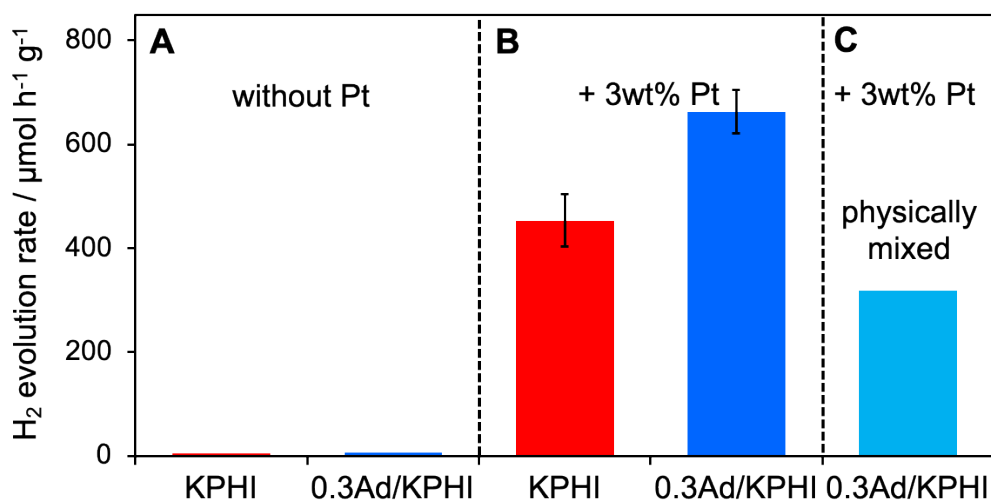

Figure S5. Photocatalytic H<sub>2</sub> evolution rates of pure KPHI and 0.3Ad/KPHI (A) without and (B) with 3 wt% Pt cocatalyst. (C) Photocatalytic H<sub>2</sub> evolution rate of a simple mixture of Ad-carbon and KPHI. Reaction conditions: catalyst, 50 mg; solution, 38 mL H<sub>2</sub>O (10 vol% TEOA); light source, white LED ( $\lambda > 420$  nm). By considering that ~150 mg of 0.3Ad/KPHI photocatalyst powder is produced from one-step salt-melt assisted condensation of 0.3 mg Ad

with 1 g 5-aminotetrazole and assuming that all of Ad-carbon remained in the sample after washing, the physically mixed sample was prepared by grinding 0.3 mg of Ad-carbon with 150 mg of pure KPHI with an agate mortar and pestle.

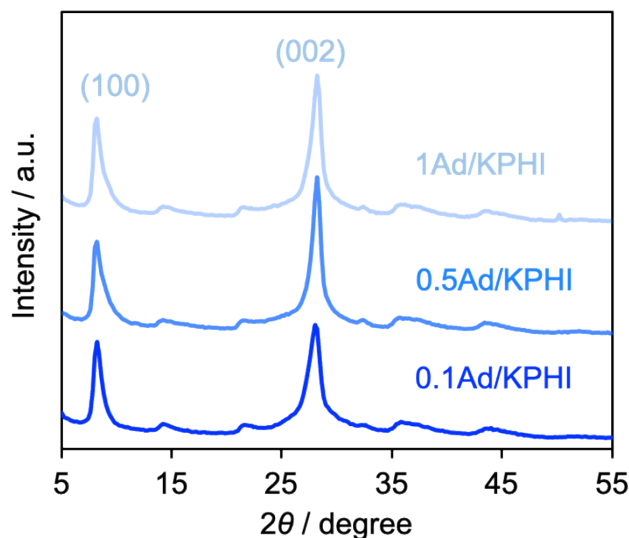

Figure S6. XRD patterns of Ad/KPHI hybrid with 0.1, 0.5 and 1 mg of Ad-carbon vs 1 g of 5-aminotetrazole.

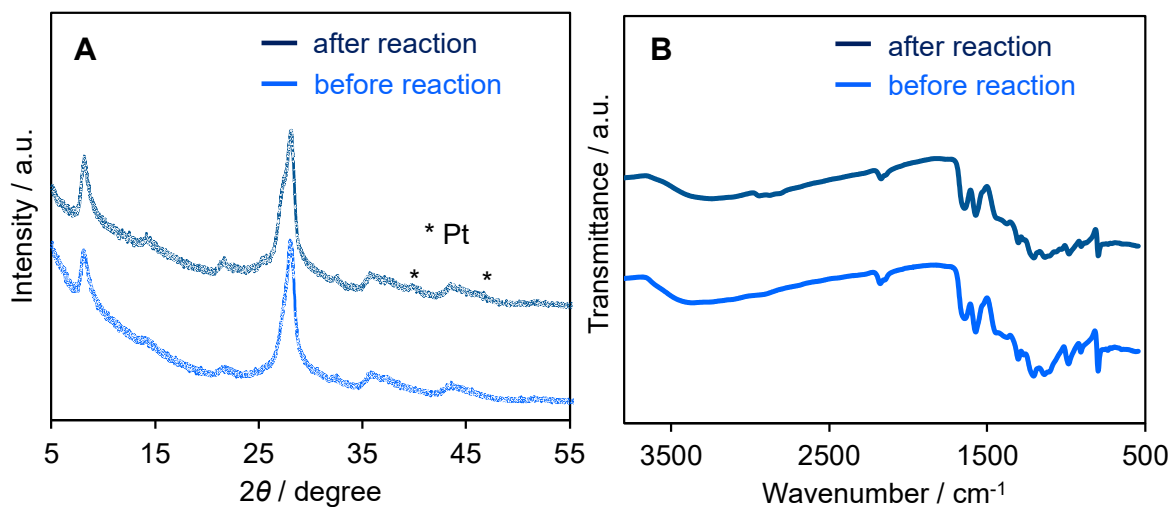

Figure S7. (A) XRD patterns and (B) FTIR spectra of 0.3Ad/KPHI before and after H<sub>2</sub> evolution

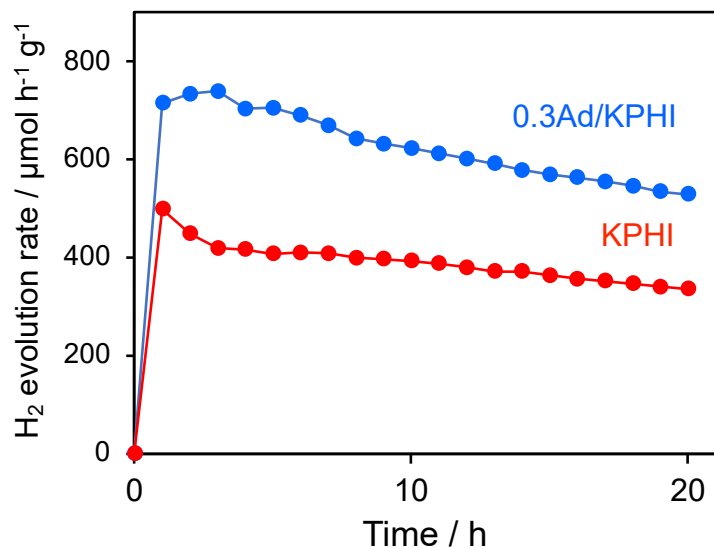

recyclability tests.

| Catalysts         | Light source                   | Sacrificial electron donor | H <sub>2</sub> O <sub>2</sub> rate /mmol h <sup>-1</sup> g <sub>cat</sub> <sup>-1</sup> | Volume (mL) | Reference        |
|-------------------|--------------------------------|----------------------------|-----------------------------------------------------------------------------------------|-------------|------------------|
| <b>0.3Ad/KPHI</b> | <b>100 W LED lamp (410 nm)</b> | <b>Glycerin</b>            | <b>3.94</b>                                                                             | <b>2</b>    | <b>This work</b> |
| H-PHI             | 100 W LED lamp (410 nm)        | Glycerin                   | 3.11                                                                                    | 2           | 14               |
| <b>KPHI</b>       | <b>100 W LED lamp (410 nm)</b> | <b>Glycerin</b>            | <b>3.02</b>                                                                             | <b>2</b>    | <b>This work</b> |
| Na-PHI            | 100 W LED lamp (410 nm)        | Glycerin                   | 2.15                                                                                    | 2           | 14               |
| O/K-CN            | 300 W Xe lamp (> 420 nm)       | 2-Propanol                 | 15.45                                                                                   | 50          | 15               |
| ACNN              | 300 W Xe lamp (> 420 nm)       | 2-Propanol                 | 10.2                                                                                    | 50          | 16               |
| OCN/NBS           | Xe lamp                        | 2-Propanol                 | 4.46                                                                                    | 50          | 17               |

Figure S8. Time course of the photocatalytic H<sub>2</sub> evolution rates of pure KPHI and 0.3Ad/KPHI in the long-term durability test. Reaction conditions: catalyst, 50 mg; solution, 38 mL H<sub>2</sub>O (10 vol% TEOA); cocatalyst, 3 wt% Pt; light source, white LED ( $\lambda > 420$  nm).

Table S4. Comparison of H<sub>2</sub>O<sub>2</sub> production rates of different carbon nitride-based photocatalysts reported in the literature

|                                                                              |                                         |                |      |    |    |
|------------------------------------------------------------------------------|-----------------------------------------|----------------|------|----|----|
| TiO <sub>2</sub>                                                             | 450 W high pressure Hg lamp (> 280 nm)  | Benzyl alcohol | 0.33 | 5  | 18 |
| Cd <sub>3</sub> (C <sub>3</sub> N <sub>3</sub> S <sub>3</sub> ) <sub>2</sub> | 300 W Xe lamp (> 420 nm)                | Methanol       | 0.55 | 20 | 19 |
| PCN-NaCA-2                                                                   | 100 mW cm <sup>-2</sup> Solar simulator | Glycerin       | 18.7 | 50 | 20 |
| CNK-0.8                                                                      | 30.7 mW cm <sup>-2</sup> LED light      | Ethanol        | 4.43 | 5  | 21 |
| C-P-CN                                                                       | 300 W Xe lamp (> 400 nm)                | Ethanol        | 3.32 | 50 | 22 |

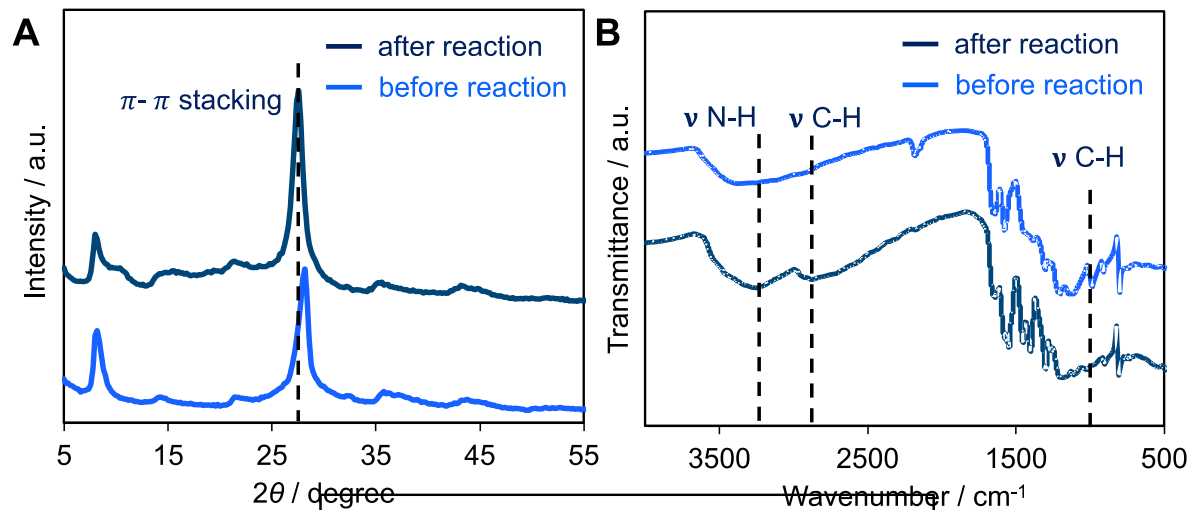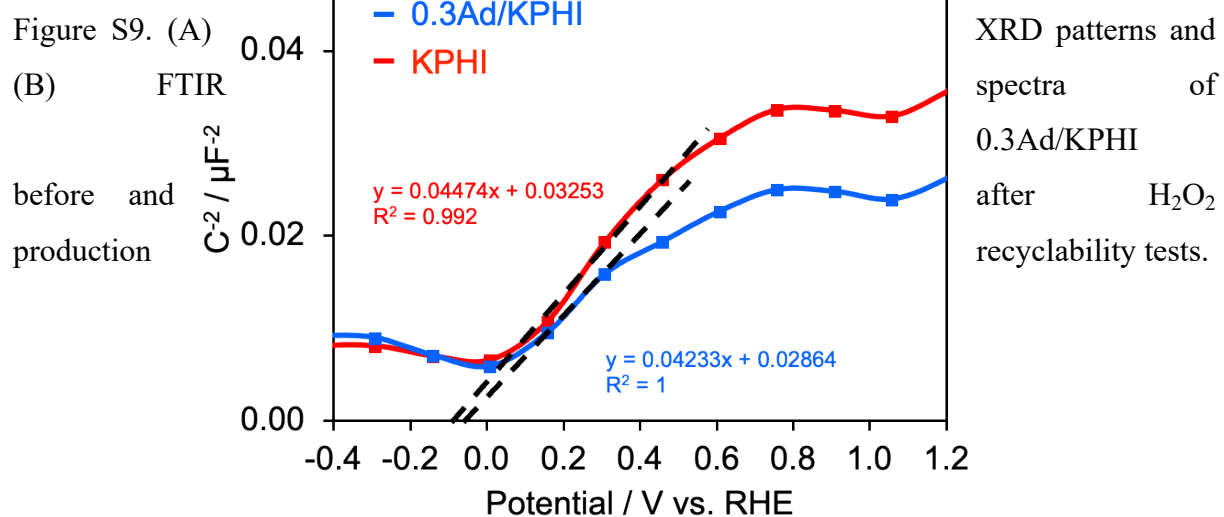

Figure S9. (A) XRD patterns and (B) FTIR spectra of 0.3Ad/KPHI before and after production and H<sub>2</sub>O<sub>2</sub> recyclability tests.

Figure S10. Mott-Schottky plots of KPHI and 0.3Ad/KPHI.

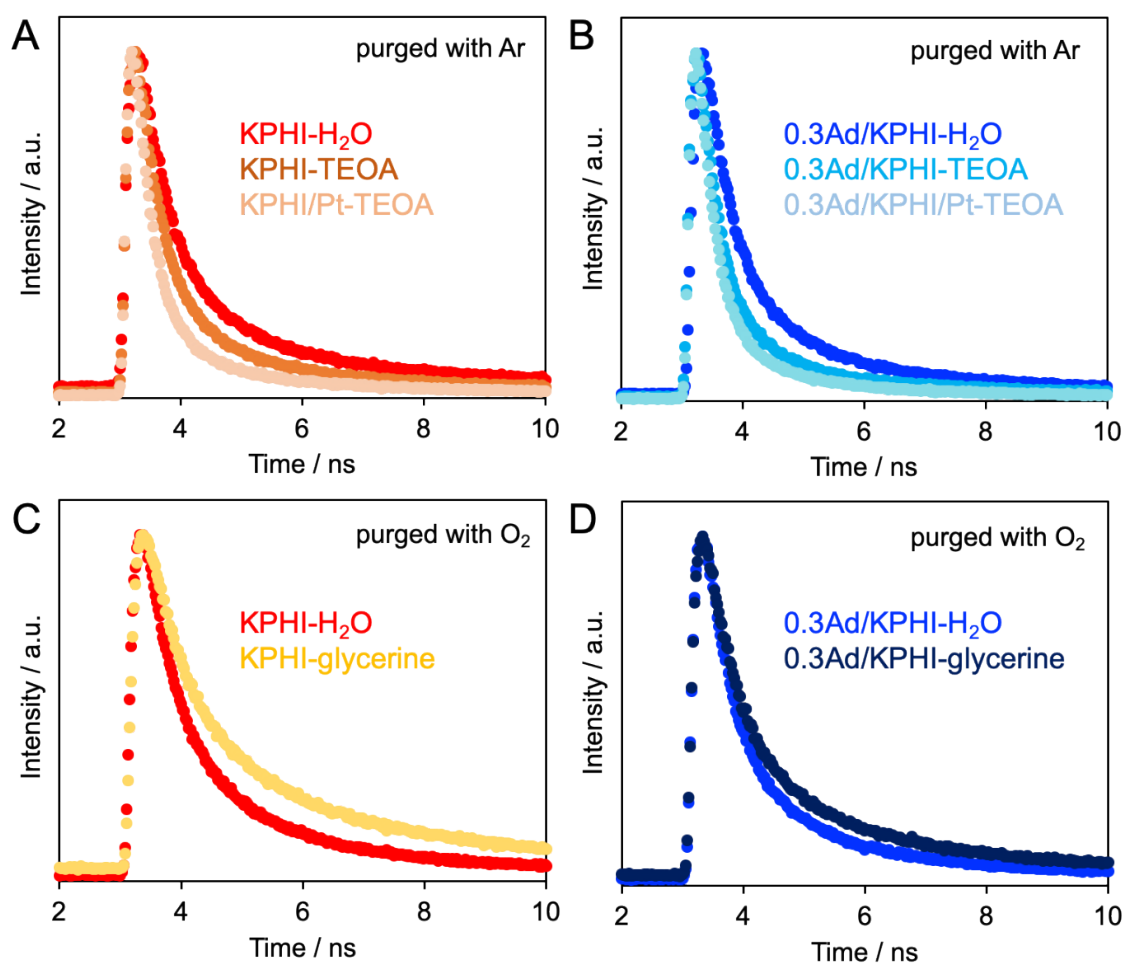

Figure S11. Time-resolved transient PL decay curves of KPHI and 0.3Ad/KPHI in aqueous suspensions under different conditions.

| Sample                      | $A_1$ | $\tau_1$ (ns) | $A_2$ | $\tau_2$ (ns) | $A_3$ | $\tau_3$ (ns) | $\tau_{ave}$ (ns) | Purged Gas     |
|-----------------------------|-------|---------------|-------|---------------|-------|---------------|-------------------|----------------|
| KPHI-H <sub>2</sub> O       | 16.98 | 0.15          | 1.54  | 4.11          | 6.92  | 0.83          | 2.14              |                |
| KPHI-TEOA                   | 26.7  | 0.10          | 1.07  | 4.17          | 6.56  | 0.69          | 1.87              |                |
| KPHI/Pt-TEOA                | 44.6  | 0.07          | 0.71  | 4.61          | 4.69  | 0.60          | 1.81              |                |
| 0.3Ad/KPHI-H <sub>2</sub> O | 19.6  | 0.13          | 1.37  | 3.97          | 7.05  | 0.77          | 1.94              | Ar             |
| 0.3Ad/KPHI-TEOA             | 37.4  | 0.08          | 0.84  | 4.30          | 5.84  | 0.63          | 1.75              |                |
| 0.3Ad/KPHI/Pt-TEOA          | 42.7  | 0.08          | 0.57  | 4.18          | 4.26  | 0.63          | 1.40              |                |
| KPHI-H <sub>2</sub> O       | 15.5  | 0.15          | 1.84  | 3.67          | 7.34  | 0.87          | 1.99              |                |
| KPHI-glycerine              | 12.34 | 0.14          | 3.11  | 4.28          | 6.96  | 0.94          | 2.93              |                |
| 0.3Ad/KPHI-H <sub>2</sub> O | 18.77 | 0.14          | 1.35  | 4.03          | 6.73  | 0.84          | 1.96              | O <sub>2</sub> |
| 0.3Ad/KPHI-glycerine        | 17.18 | 0.12          | 2.22  | 3.94          | 7.1   | 0.80          | 2.37              |                |

Table S5. PL lifetime values of KPHI and 0.3Ad/KPHI in aqueous suspension under different experimental conditions.

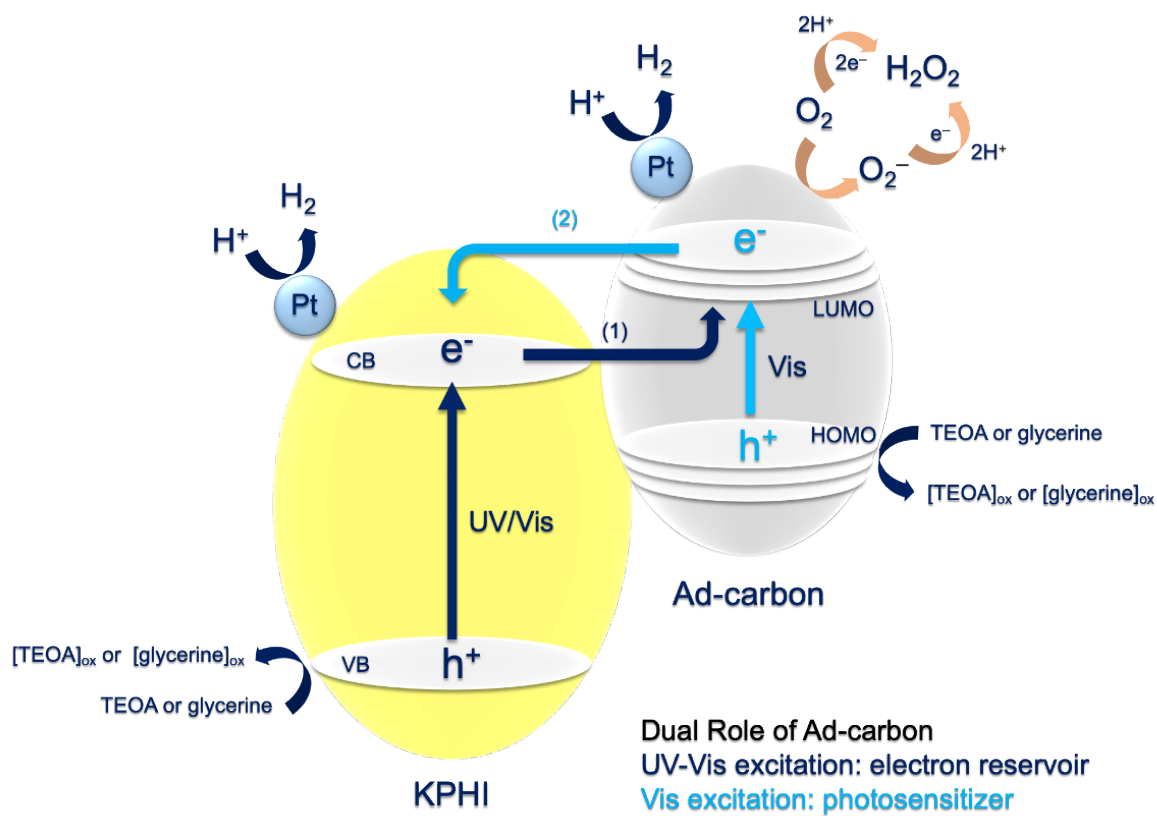

Figure S12. Schematic illustration of photocatalytic H<sub>2</sub> and H<sub>2</sub>O<sub>2</sub> evolution over the 0.3Ad/KPHI hybrid photocatalyst system.



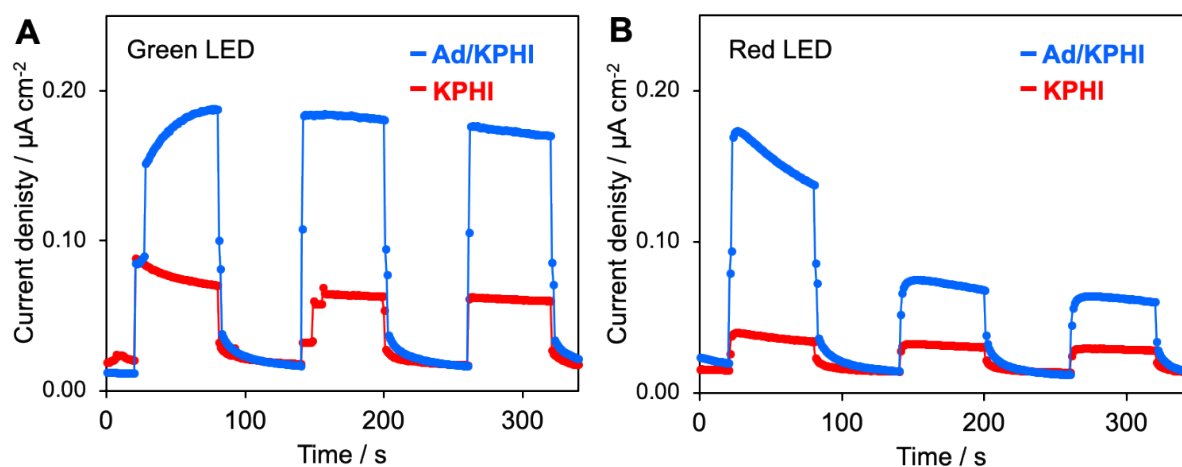

Figure S13. Transient photocurrent (applied potential 0.3 V) for KPHI and 0.3Ad/KPHI in 0.2 M  $\text{Na}_2\text{SO}_4$  aqueous solution under (A) green and (B) red LED illumination.

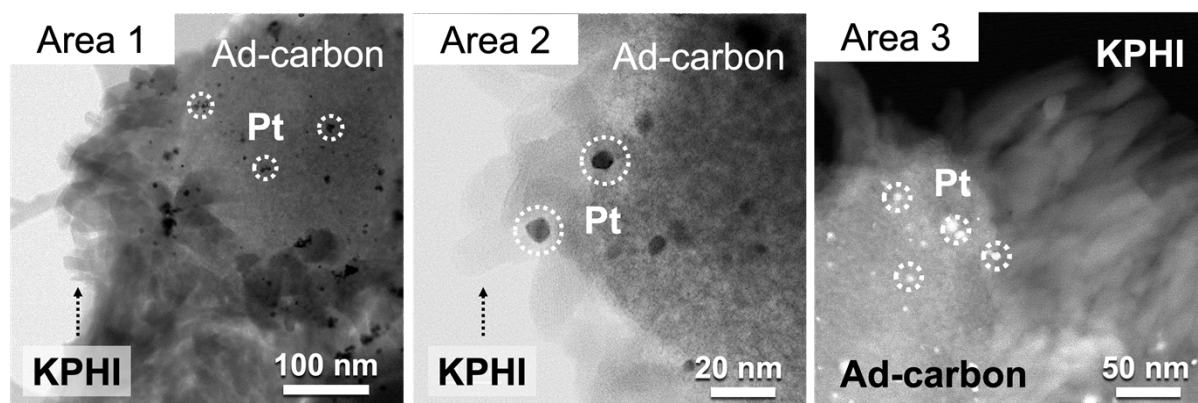

Figure S14. Additional BF- and HAADF-STEM images showing various random areas of 3Ad/KPHI hybrid sample (Ad-carbon concentration is increased by 10x to easily locate the heterostructure).

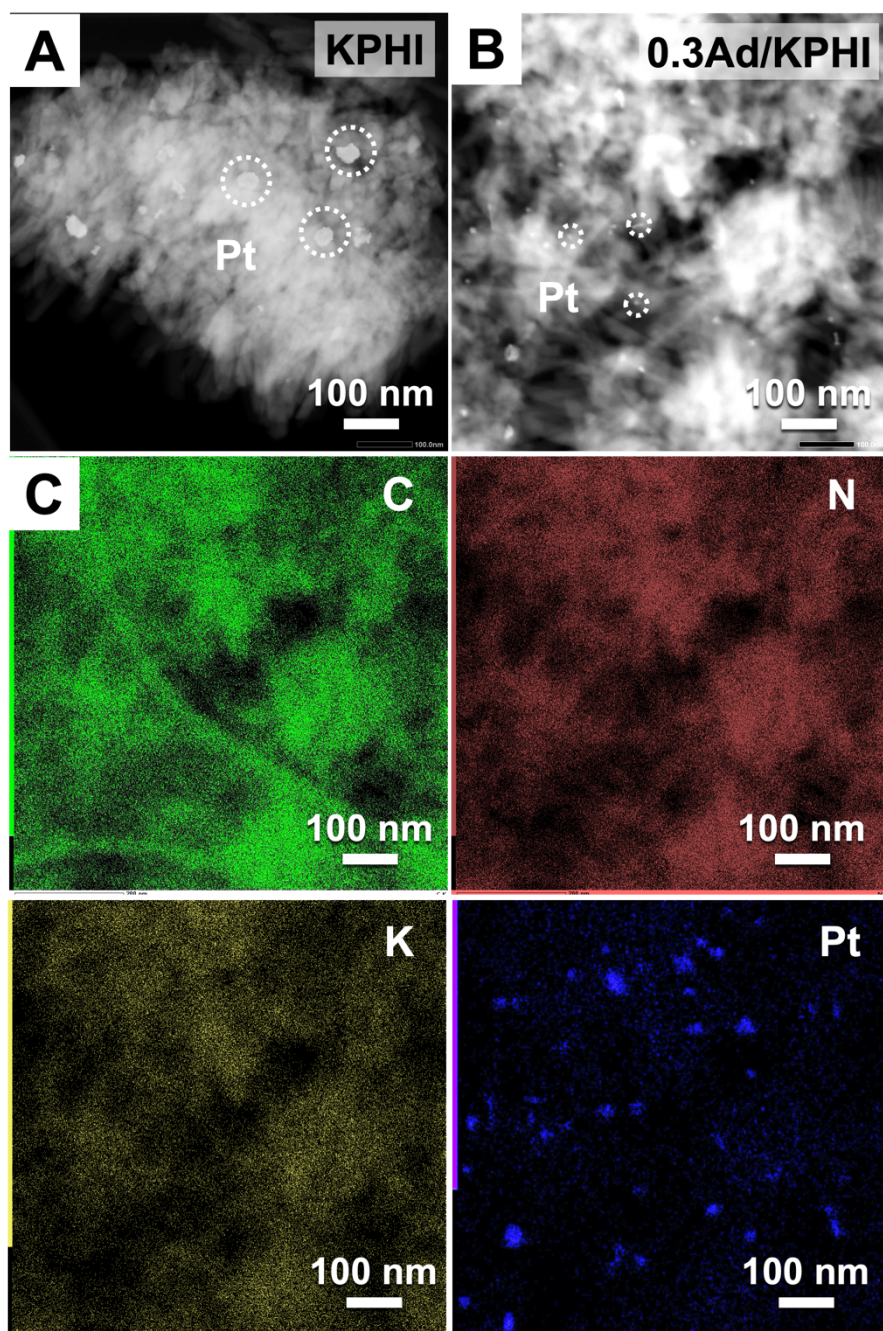

Figure S15. Additional HAADF-STEM images of (A) KPHI and (B) 0.3Ad/KPHI hybrid sample. (C) STEM-EDX elemental mapping images of (B).

## References

1. J. Li, J. Kossmann, K. Zeng, K. Zhang, B. Wang, C. Weinberger, M. Antonietti, M. Odziomek and N. López-Salas, *Angew. Chem. Int. Ed.* 2023, e202217808.
2. Y. Wang, X. Liu, X. Han, R. Godin, J. Chen, W. Zhou, C. Jiang, J. F. Thompson, K. B. Mustafa, S. A. Shevlin, J. R. Durrant, Z. Guo and J. Tang, *Nat. Commun.*, 2020, **11**, 2531.
3. A. Savateev, D. Dontsova, B. Kurpil and M. Antonietti, *J. Catal.*, 2017, **350**, 203–211.
4. R. M. Sellers *Analyst*, 1980, **105**, 950–954.
5. H. Schlomberg, J. Kröger, G. Savasci, M. W. Terban, S. Bette, I. Moudrakovski, V. Duppel, F. Podjaski, R. Siegel, J. Senker, R. E. Dinnebier, C. Ochsenfeld and B. V. Lotsch, *Chem. Mater.* **2019**, 31 (18), 7478–7486.
6. J. Zhang, X. Chen, K. Takanabe, K. Maeda, K. Domen, J. D. Epping, X. Fu, M. Antonietti and X. Wang, *Angew. Chem. Int. Ed.*, **2010**, 49 (2), 441–444.
7. W. Jiang, Q. Ruan, J. Xie, X. Chen, Y. Zhu and J. Tang, *Appl. Catal. B: Environ.* **2018**, 236, 428–435.
8. Y. Wang, M. K. Bayazit, S. J. A. Moniz, Q. Ruan and J. Tang, *Energ. Environ. Sci.* **2017**, 10, 1643–1651.
9. S. Guo, Z. Deng, M. Li, B. Jiang, C. Tian, Q. Pan and H. Fu, *Angew. Chem. Int. Ed. Engl.* **2016**, 55, 1830–1834.
10. Y. Li, F. Gong, Q. Zhou, X. Feng, J. Fan and Q. Xiang, *Appl. Catal. B: Environ.* **2020**, 268, 118381
11. N. Tian, K. Xiao, Y. Zhang, X. Lu, L. Ye, P. Gao, T. Ma and H. Huang, *Appl. Catal. B: Environ.* **2019**, 253, 196–205.
12. M. Wu, J. Zhang, B.-b. He, H.-w. Wang, R. Wang and Y.-s. Gong, *Appl. Catal. B: Environ.* **2019**, 241, 159–166.
13. G. Zhang, L. Lin, G. Li, Y. Zhang, A. Savateev, S. Zafeiratos, X. Wang and M. Antonietti, *Angew. Chem. Int. Ed. Engl.* **2018**, 57, 9372–9376.
14. A. Rogolino, I. Silva, N. Tarakina, M. da Silva, G. Rocha, M. Antonietti and I. Teixeira, *ACS Appl. Mater. Interfaces*, 2022, **14**, 44, 49820–49829.
15. W. Liu, P. Wang, J. Chen, X. Gao, H. Che, B. Liu, Y. Ao, *Adv. Funct. Mater.* 2022, **32**, 2205119.
16. S. Wu, H. Yu, S. Chen and X. Quan, *ACS Catal.*, 2020, **10**, 14380–14389.
17. F. Farzin, M. K. Rofouei, M. Mousavi, Ja. B. Ghasemi, *J. Phys. Chem. Solids* 2022, **163**, 110588.
18. Y. Shiraishi, S. Kanazawa, D. Tsukamoto, A. Shiro, Y. Sugano and T. Hirai, *ACS Catal.*, 2013, **3**, 2222–2227.
19. H. Zhuang, L. Yang, J. Xu, F. Li, Z. Zhang, H. Lin, J. Long, X. Wang, *Sci. Rep.* 2015, **5**, 16947.
20. Y. Zhao, P. Zhang, Z. Yang, L. Li, J. Gao, S. Chen, T. Xie, C. Diao, S. Xi, B. Xiao, C. Hu and W. Choi, *Nat. Commun.*, 2021, **12**, 3701.
21. Z. Li, Y. Chen, X. Chen, L. Li, S. Kuang, Y. Guo, Y. Wang, J. Gao, *Appl. Surf. Sci.* 2023, **609**, 155432.
22. W. Wei, L. Zou, J. Li, F. Hou, Z. Sheng, Y. Li, Z. Guo, and A. Wei, *J. Colloid Interface Sci.*, 2023, **636**, 537–548.
